# Supplementary material for: Green synthesis of polypyrrole-SnO 2 nanocomposites using Foeniculum vulgare extract for crystal violet adsorption and solvent-dependent radical scavenging
Source: Royal Society of Chemistry journal article supplement (doi:10.1039/d5ra09693f), 2026-01-01
Supplement: d5ra09693f1.pdf [file d5ra09693f1.pdf]

## Supplementary Information

### Green *Foeniculum vulgare* Assisted Synthesis of Polypyrrole–SnO<sub>2</sub> Nanocomposites: Dual Function in Crystal Violet Adsorption and Solvent-Dependent Radical Scavenging

Priya Kaushik<sup>a</sup>, Ruchi Bharti<sup>a\*</sup>, Renu Sharma<sup>a</sup>, and Annu Pandey<sup>b\*</sup>

<sup>a</sup>Department of Chemistry, University Institute of Sciences, Chandigarh University, Punjab, India

<sup>b</sup>Department of Fibre and Polymer Technology, KTH Royal Institute of Technology, Stockholm, Sweden

\*Corresponding authors E-mail addresses: [ruchi.uis@cumail.in](mailto:ruchi.uis@cumail.in) (R. Bharti), [annua@kth.se](mailto:annua@kth.se) (A. Pandey).

#### Plant Material and Extract Preparation:

*Foeniculum vulgare* seeds (fennel) were purchased from a local herbal market in Chandigarh, India. As *F. vulgare* is a commonly available culinary and medicinal plant, the seeds were used without further authentication. The species is well established; therefore, no special collection permits or ethical approval were required.

#### Result:

**Characterization:** The polypyrrole-coated stannous nanocomposites (PPy–SnO<sub>2</sub> NCs) employed in this study were synthesized via chemical oxidative polymerization. The synthesized PPy–SnO<sub>2</sub> NCs were characterized by various analytical techniques. Fourier transform infrared (FTIR) spectra were conducted on a PerkinElmer FTIR spectrometer, and UV-Vis absorption spectra were monitored using a Shimadzu UV-1900 spectrophotometer. The morphological features and elemental analysis were accessed via scanning electron microscopy with energy-dispersive spectroscopy (SEM-EDS, SU8010 series, HITACHI). Particle size and zeta potential were analysed with a Zetasizer Nano (Malvern Analytical, UK) provided with dynamic light scattering, and TEM-EDS was performed using a CRYO ARM™ 300 II instrument.

#### UV-VIS:

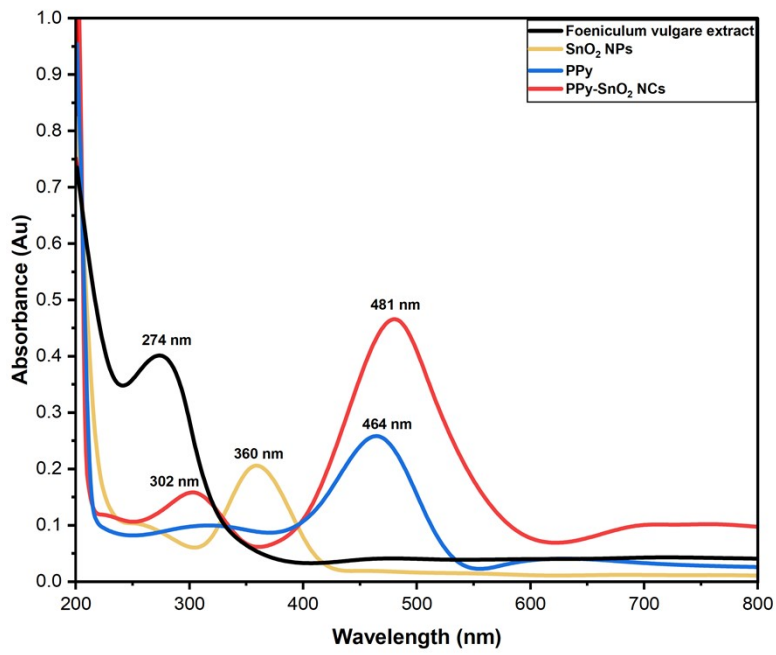

**Figure 1:** UV spectrum of (a) Foeniculum vulgare extract (b) Polypyrrole (c) SnO<sub>2</sub> nanoparticles (d) PPy-SnO<sub>2</sub> NCs

**FTIR Spectroscopy:**

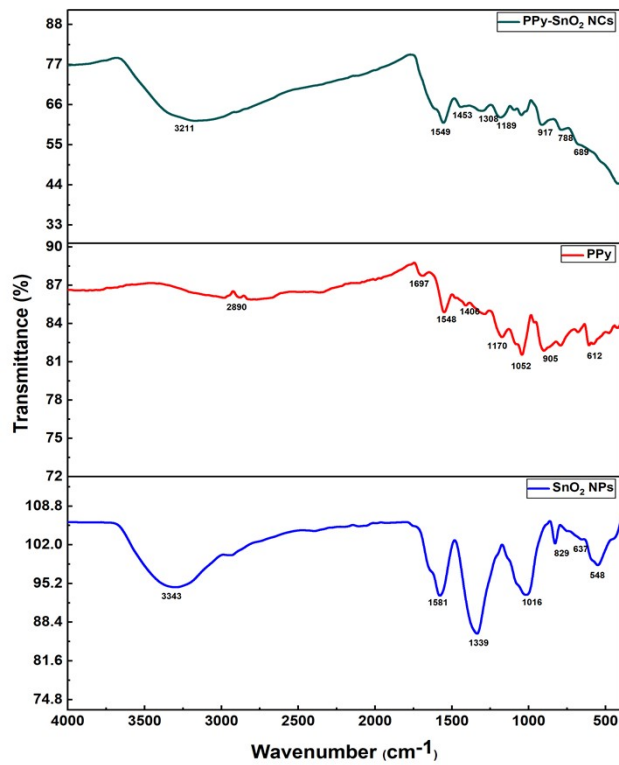

**Figure S2:** (a) FTIR analysis of PPy (b) FTIR analysis of SnO<sub>2</sub> (c) FTIR analysis of PPy- SnO<sub>2</sub> NCs.

**XRD:**

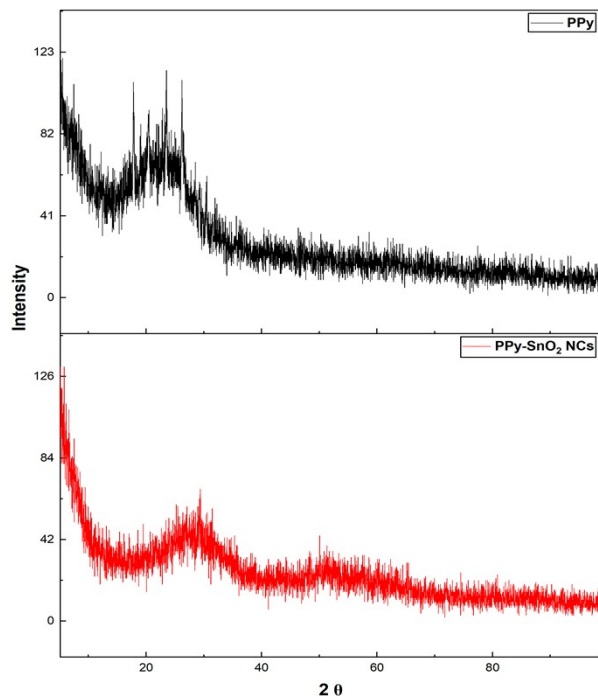

Figure S3: XRD analysis of Synthesized Ppy, and PPy-SnO<sub>2</sub> NCs.

SEM-EDS:

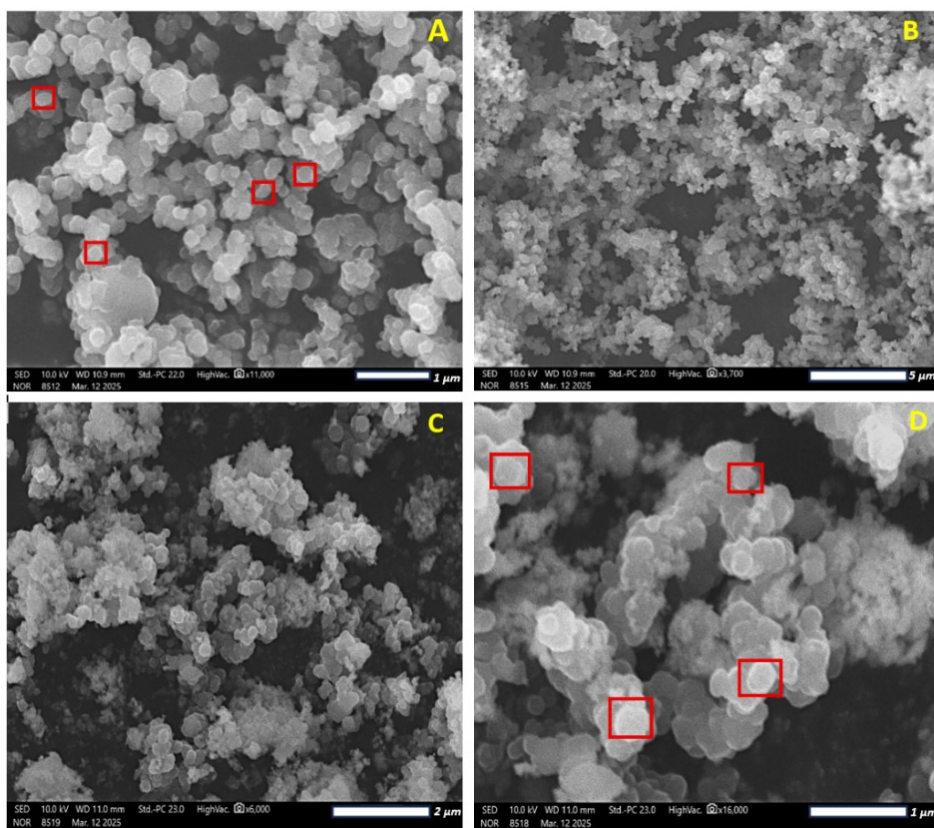

Figure S4a-d: SEM image of synthesized (a), (b) PPy and (c), (d) PPy-SnO<sub>2</sub> NCs at different magnification

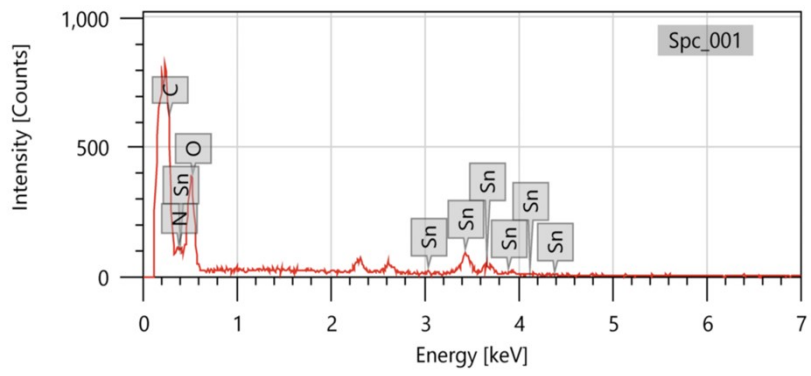

**Figure S4(e):** SEM-EDS of synthesized PPy-SnO<sub>2</sub> nanocomposites

**HRTEM:**

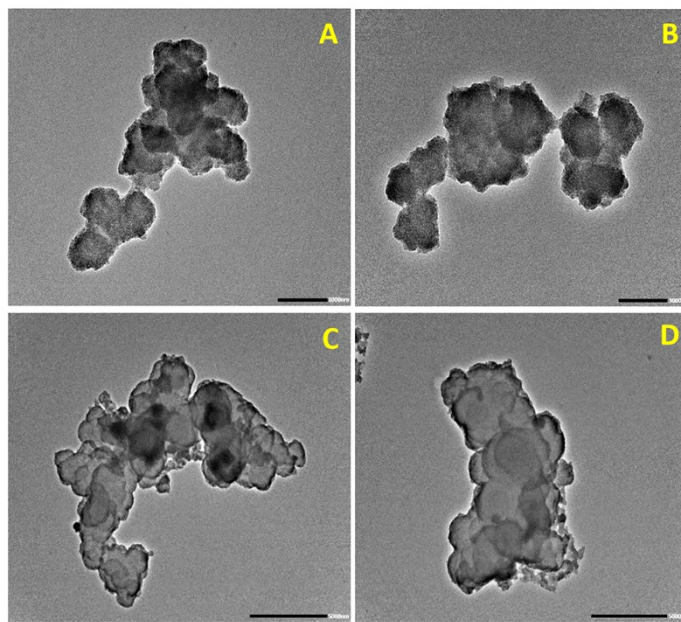

**Figure S5:** HRTEM image of synthesized (a), (b) PPy and (c), (d) PPy-SnO<sub>2</sub> NCs

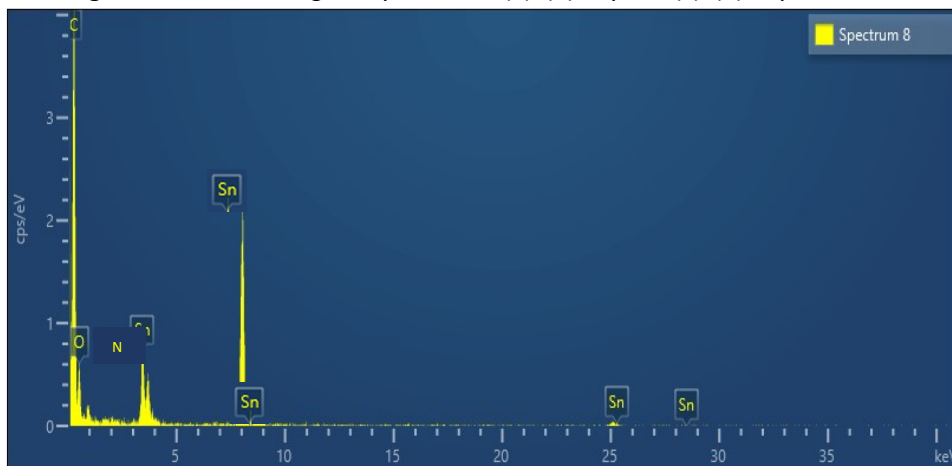

**Figure S5 (e):** HRTEM- EDS analysis of Synthesized PPy- SnO<sub>2</sub> Nanocomposites

**DLS Analysis:**

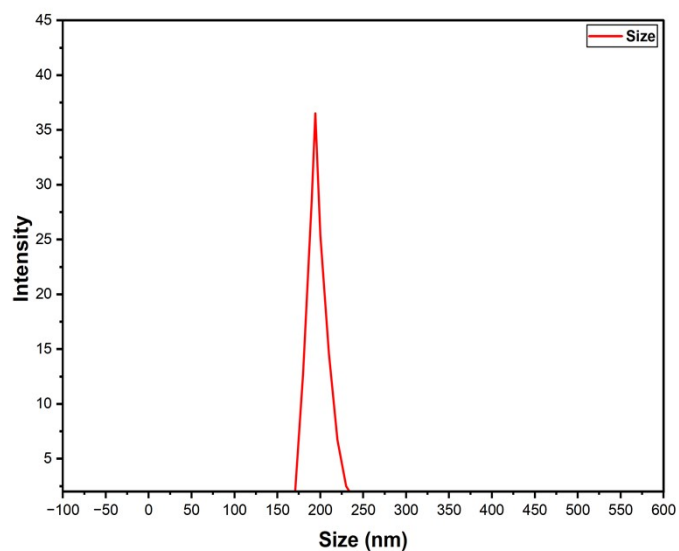

**Figure S6:** DLS analysis of Synthesized PPy- SnO<sub>2</sub> Nanocomposites

**Zeta potential:**

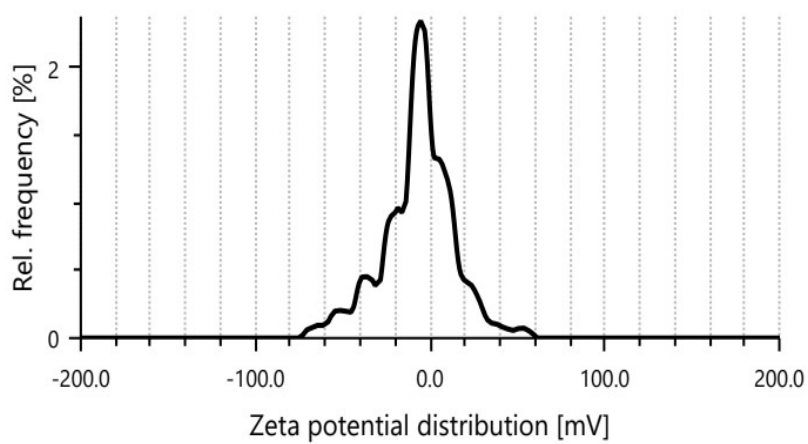

**Figure S7:** Zeta potential of PPy- SnO<sub>2</sub> nanocomposites, indicating surface charge and colloidal stability

## BET analysis

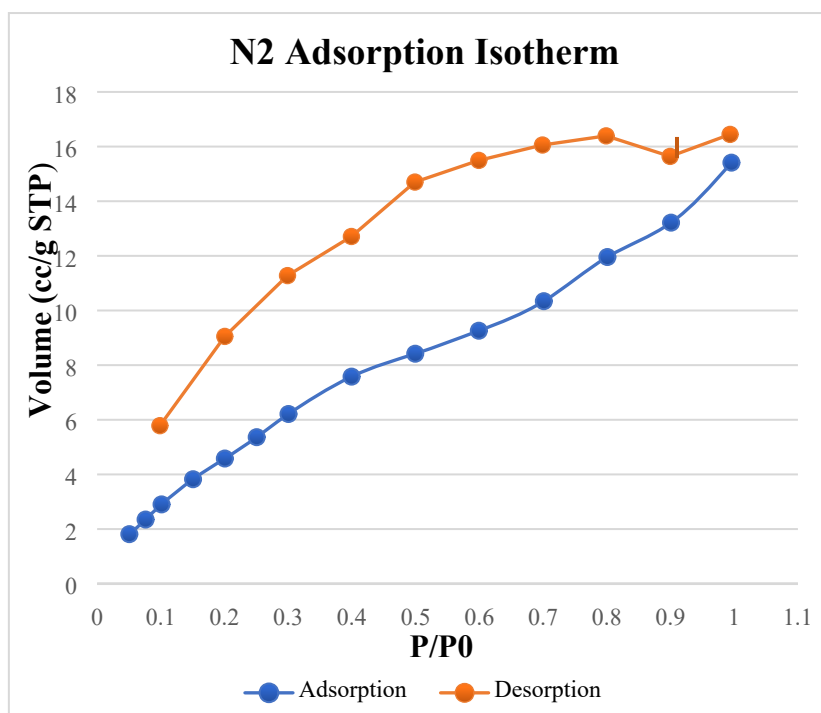

(a)

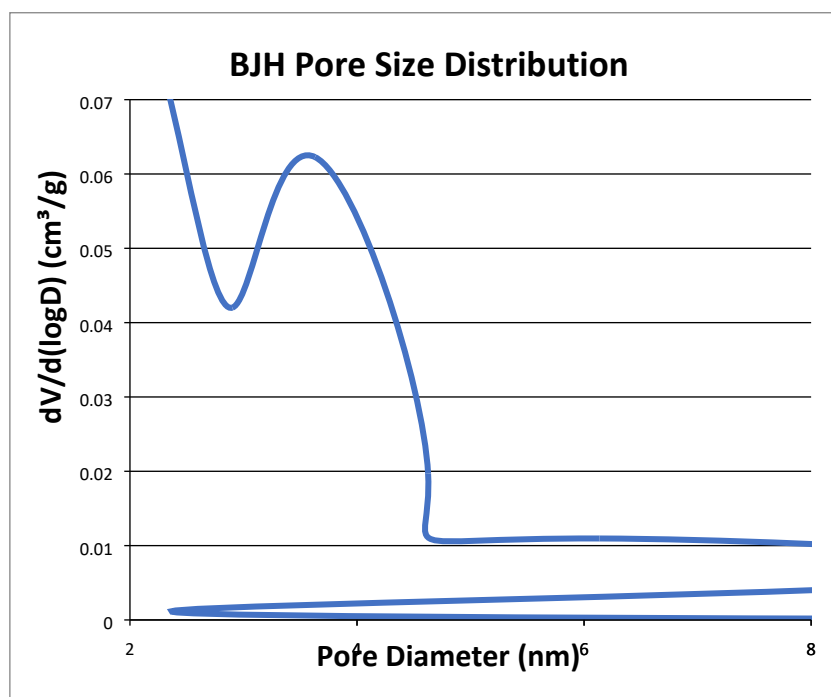

(b)

**Figure S8:** Nitrogen adsorption–desorption isotherm of PPy-SnO<sub>2</sub> NCs exhibiting Type IV behavior, characteristic of mesoporous structure, with a BET surface area of 24.14 m<sup>2</sup>/g.

## DPPH assay:

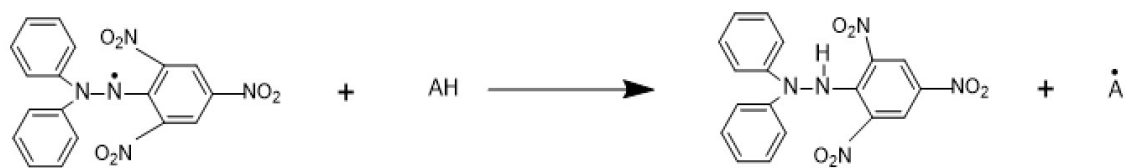

Figure S9: Mechanism for the radical scavenging activity of nanocomposites by antioxidant activity

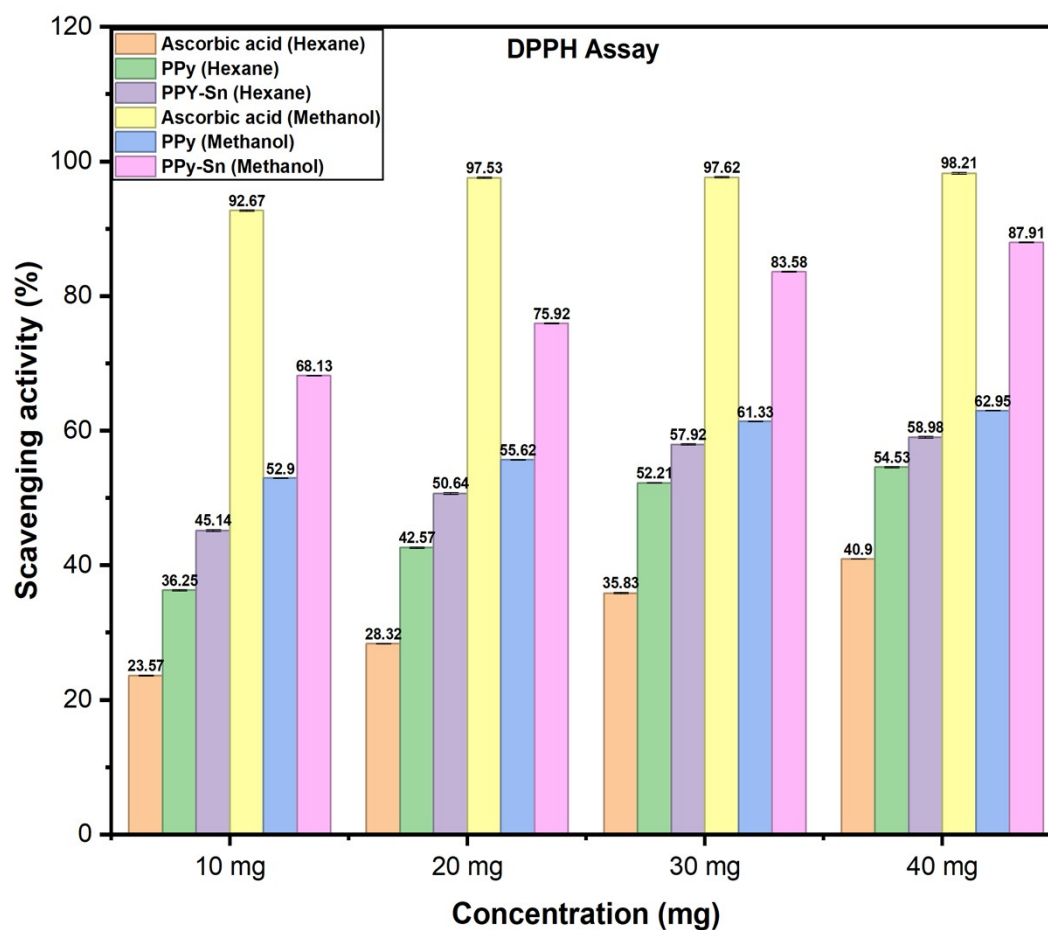

Figure S10: Graphical representation of Scavenging activity by DPPH

## ABTS Assay:

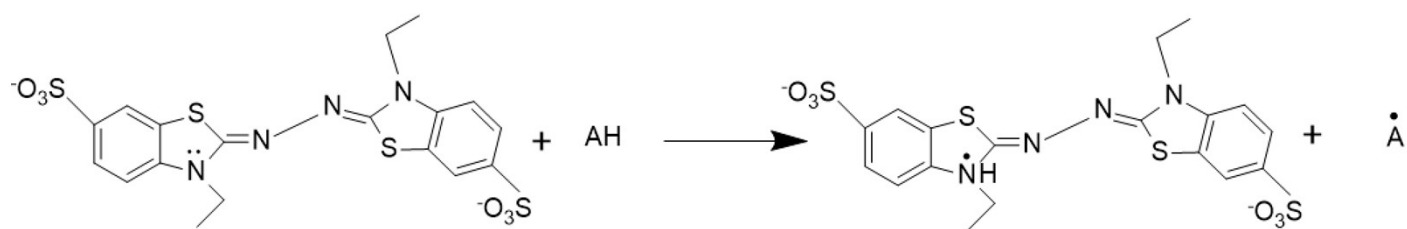

**Figure S11:** Chemical mechanism of the radical scavenging activity of nanocomposites by antioxidant activity (ABTS assay)

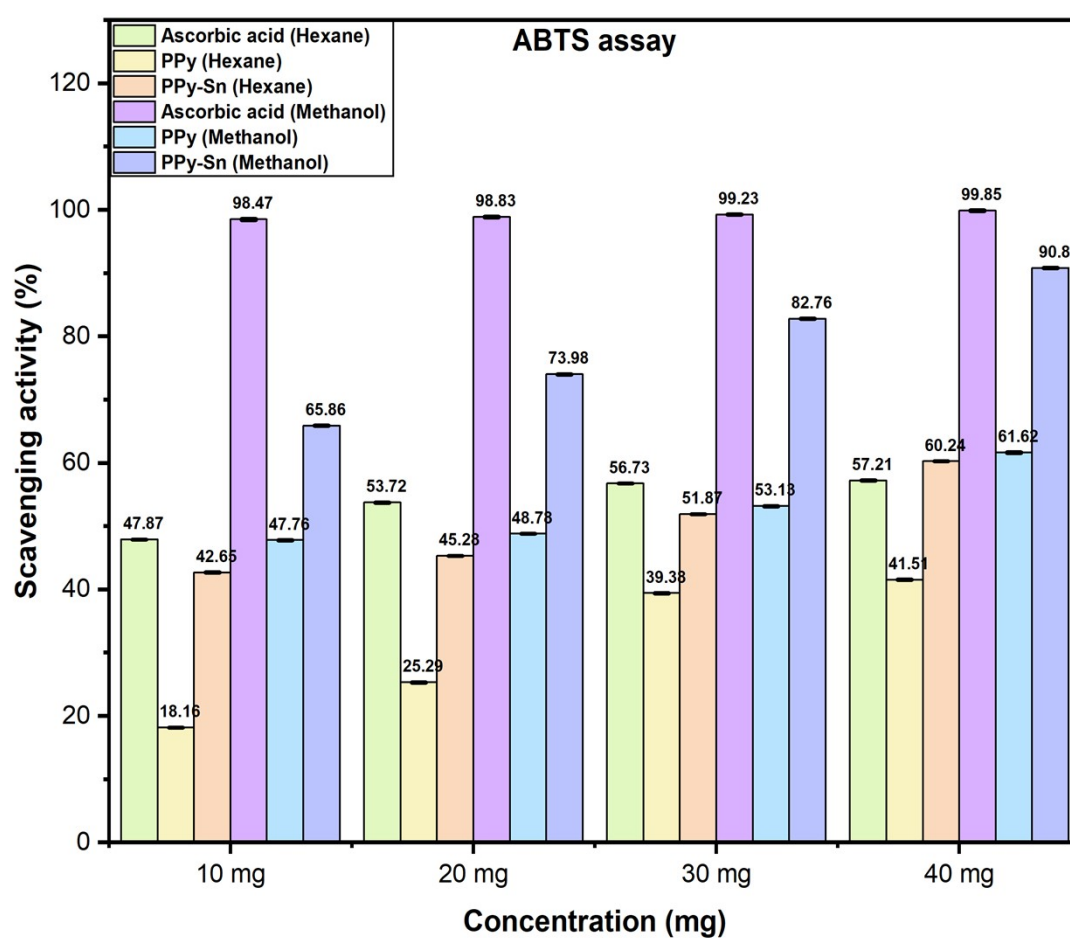

**Figure S12:** Graphical representation of Scavenging activity by ABTS

#### 4.1.1. Effect of dose of NCs



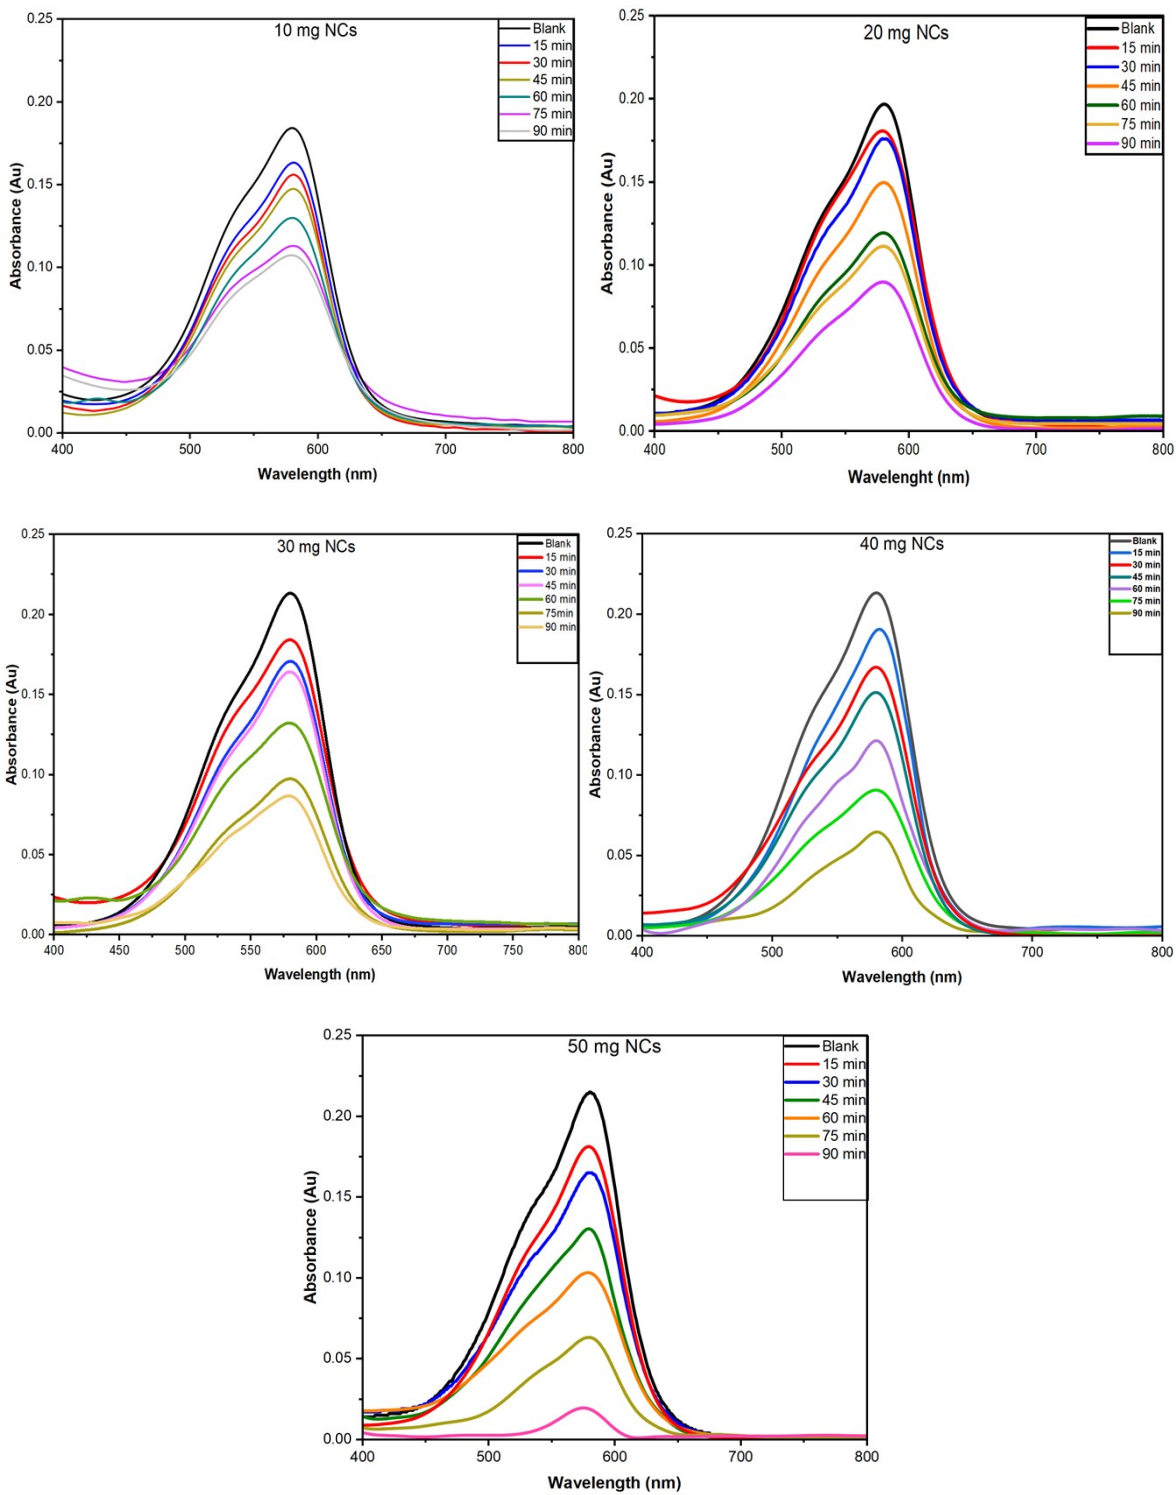

**Figure S13:** The Effect of dose of adsorbent (PPy- SnO<sub>2</sub> NCs) as 10 mg -50 mg on removal of Crystal violet dye.

#### 4.1.2. Effect of pH:

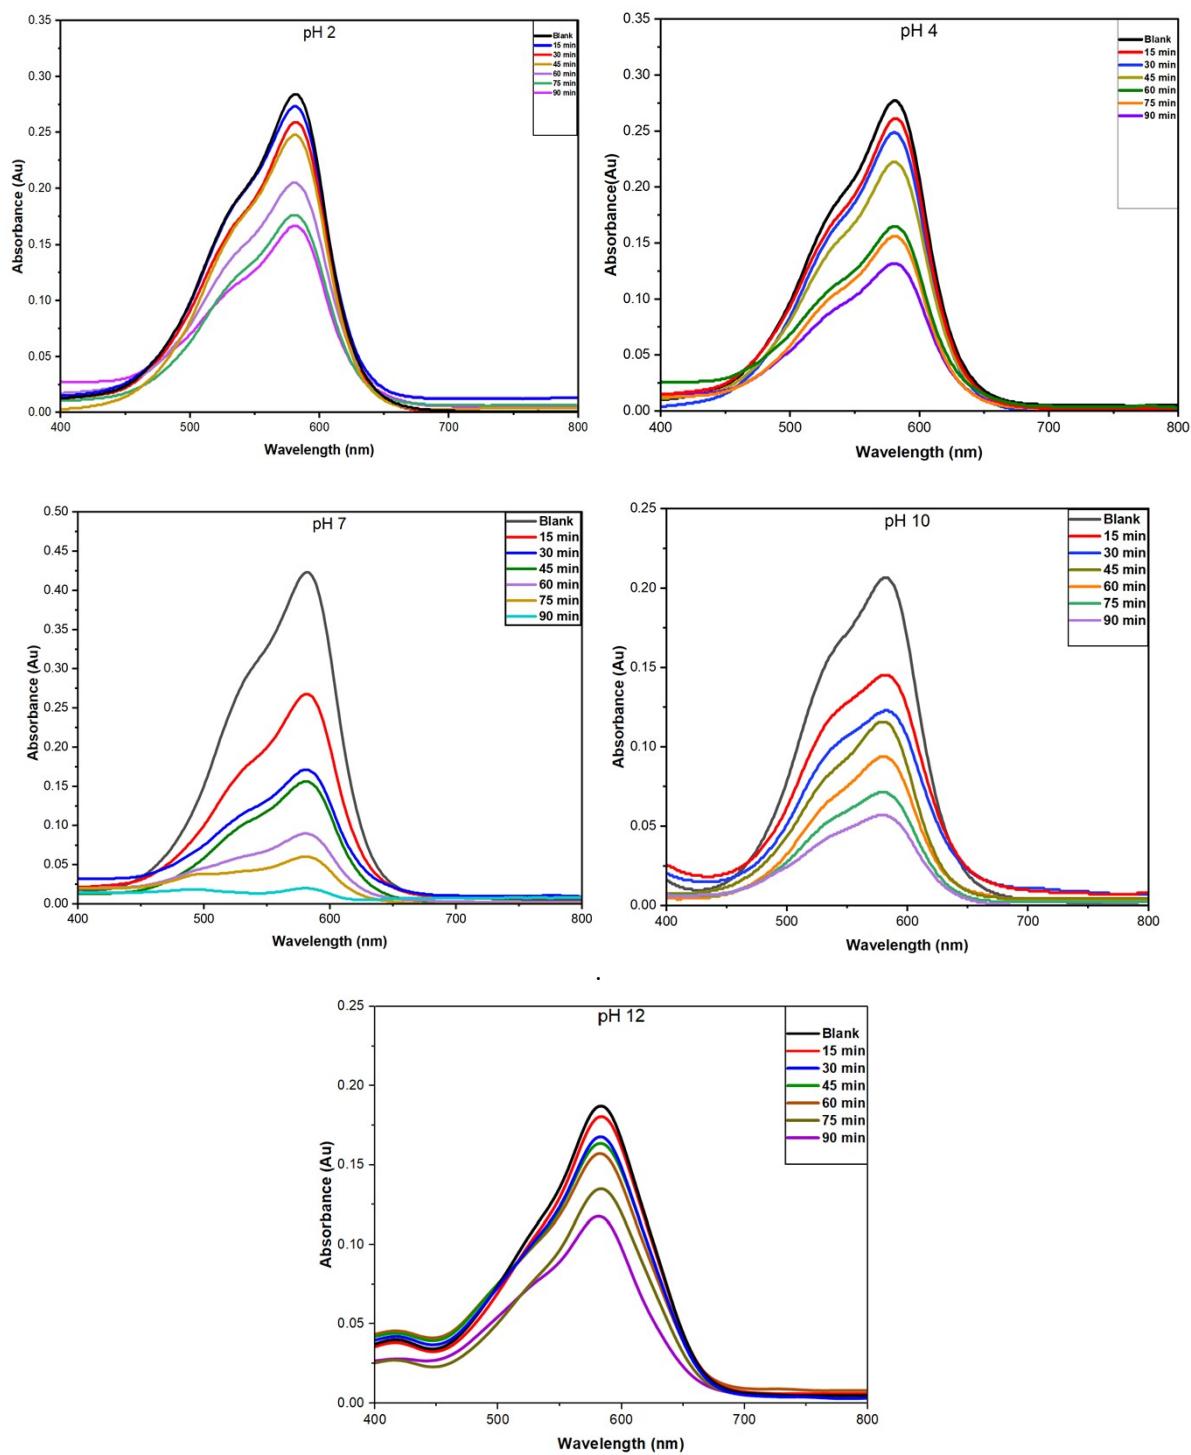

**Figure S14:** The effect of pH on dye removal was investigated under conditions of a dye solution concentration of 10 ppm, a contact time of 90 minutes, and an adsorbent dose of 50 mg.

#### 4.1.3. Effect of Concentration:

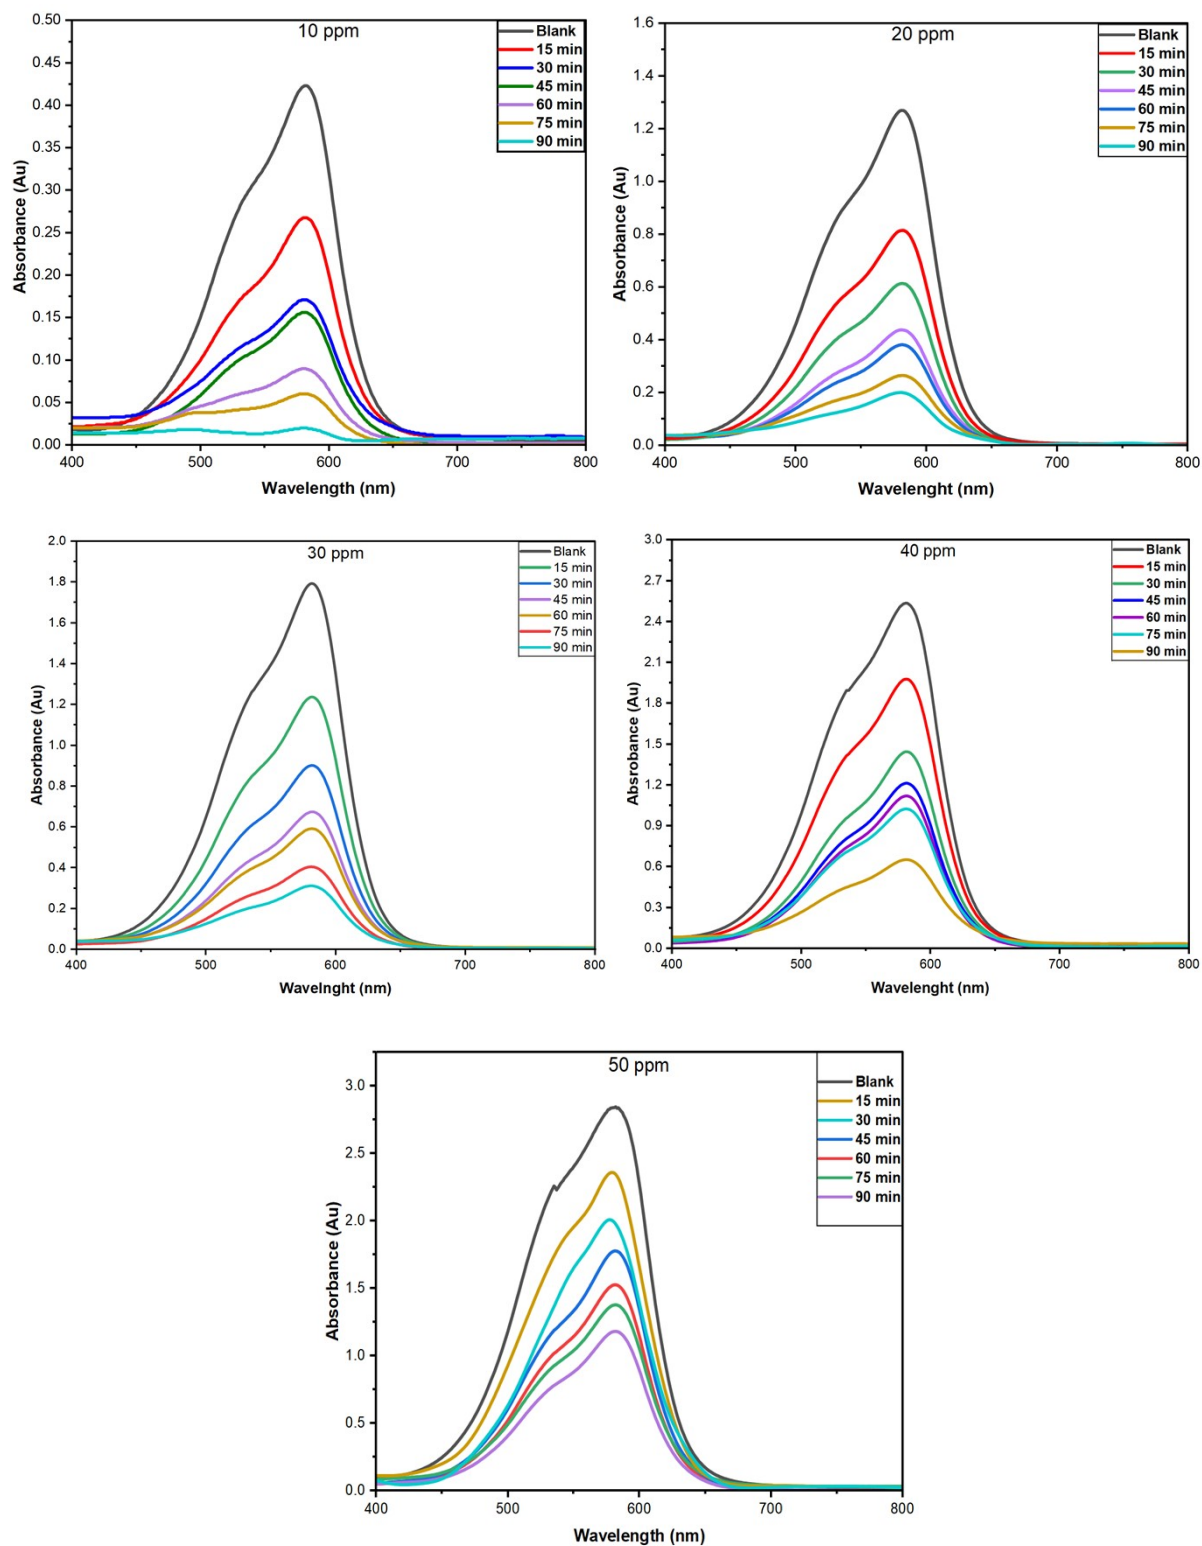

**Figure S15:** The effect of concentration dye on removal of dye was investigated under conditions of a dye solution concentration of 10 ppm, a contact time of 90 minutes, and an adsorbent dose of 50 mg.

#### 4.1.4. Effect of Temperature:

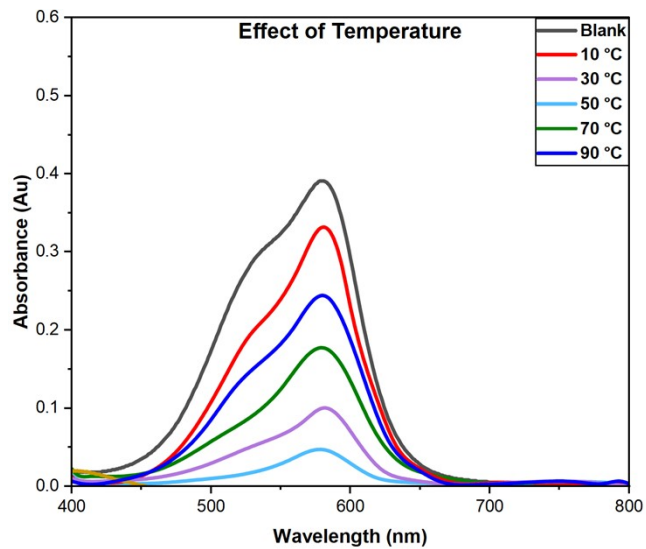

**Figure S16:** The effect of temperature on the removal of the dye was investigated under constant conditions, including a dye concentration of 10 ppm, an adsorbent dose of 50 mg, a pH of 7 in 90 minutes of contact time

#### 4.1.5. Effect of Time:

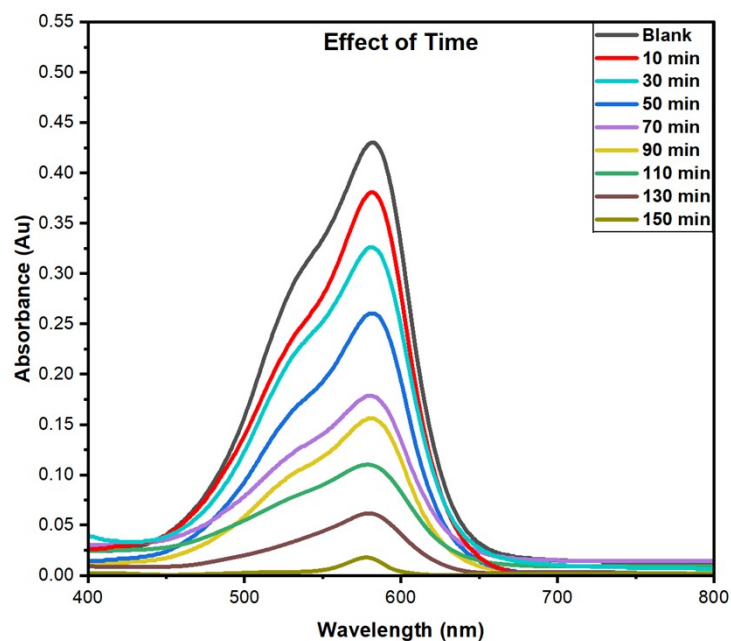

**Figure S17:** The effect of contact time on the removal of the dye was investigated under constant conditions, including a dye concentration of 10 ppm, an adsorbent dose of 50 mg, a pH of 7, and a temperature of 50°C.

#### 6.1.1. Langmuir Isotherm:

The linearized Langmuir equation is expressed as:

$$\frac{C_e}{q_e} = \frac{1}{K_L q_{max}} + \frac{C_e}{q_{max}}$$

The maximum adsorption capacity ( $Q_{max}$ ) was evaluated from the slope of the Langmuir plot using the following equation:

$$q_{max} = \frac{1}{Slope}$$

giving a value of  $162.6 \text{ mg g}^{-1}$ , highlighting the excellent performance of PPy-SnO<sub>2</sub> NCs in removing Crystal violet dye molecules from aqueous solutions. Furthermore, the Langmuir constant was obtained from the intercept according to

$$K_L = \frac{1}{Intercept * q_{max}}$$

Resulting in  $K_L = 0.48 \text{ L/mg}$ , suggesting strong binding affinity of CV molecules towards the nanocomposite surface.<sup>59</sup>

The favorability of the adsorption process was further assessed by calculating the dimensionless separation factor ( $R_L$ ), which is defined by the Langmuir isotherm as:

$$R_L = \frac{1}{1 + K_L C_0}$$

Where  $C_0$  is the initial concentration, The calculated  $R_L$  values across for all tested concentrations within the 0–1 range, confirming that the adsorption of CV dye onto PPy-SnO<sub>2</sub> nanocomposites surface is favorable and involves significant adsorbent-adsorbate interactions.

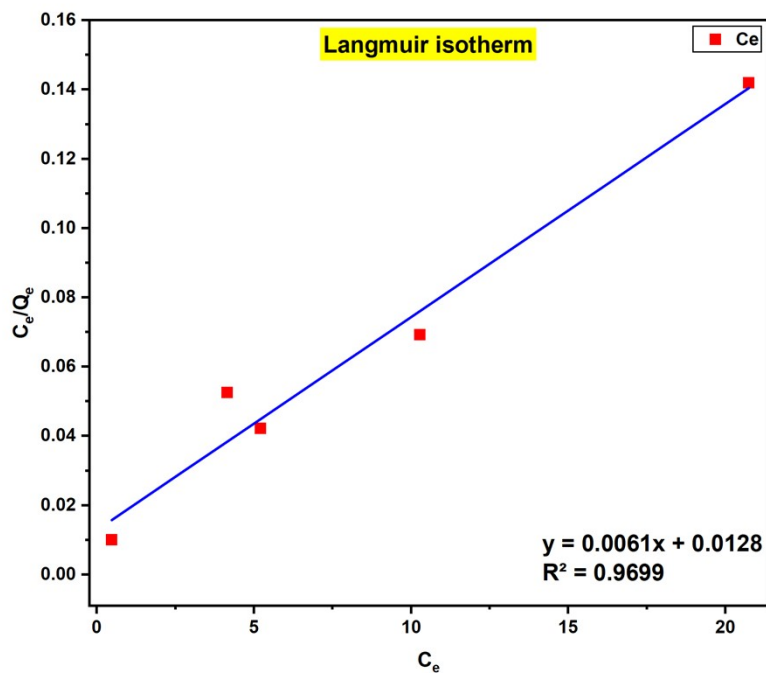

**Figure S18a:** Langmuir isotherm plot showing the adsorption of Crystal Violet dye onto synthesized PPy-SnO<sub>2</sub> nanocomposites.

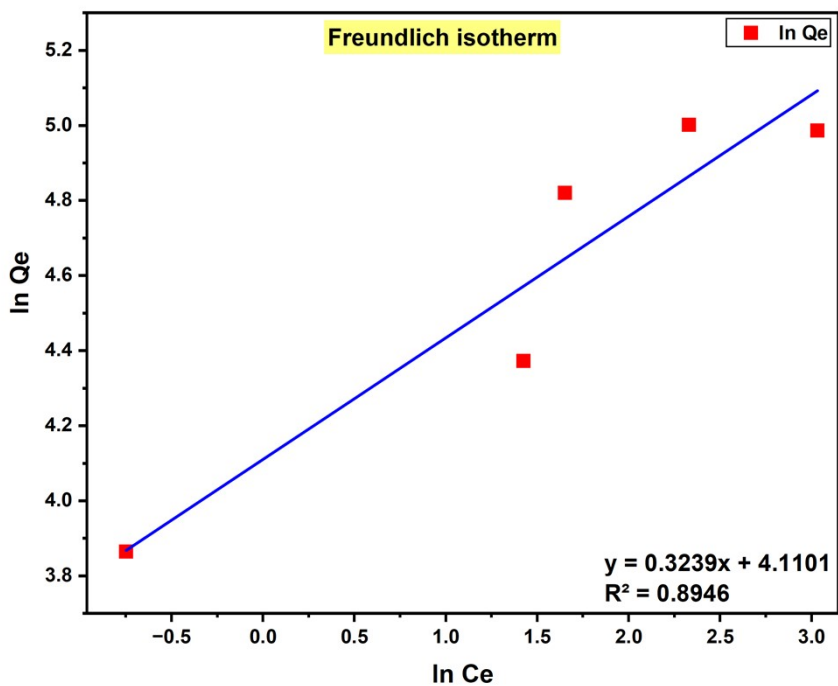

Figure S18b: Freundlich isotherm Plot for the removal of crystal violet dye by synthesized PPY-SnO<sub>2</sub> NCs.

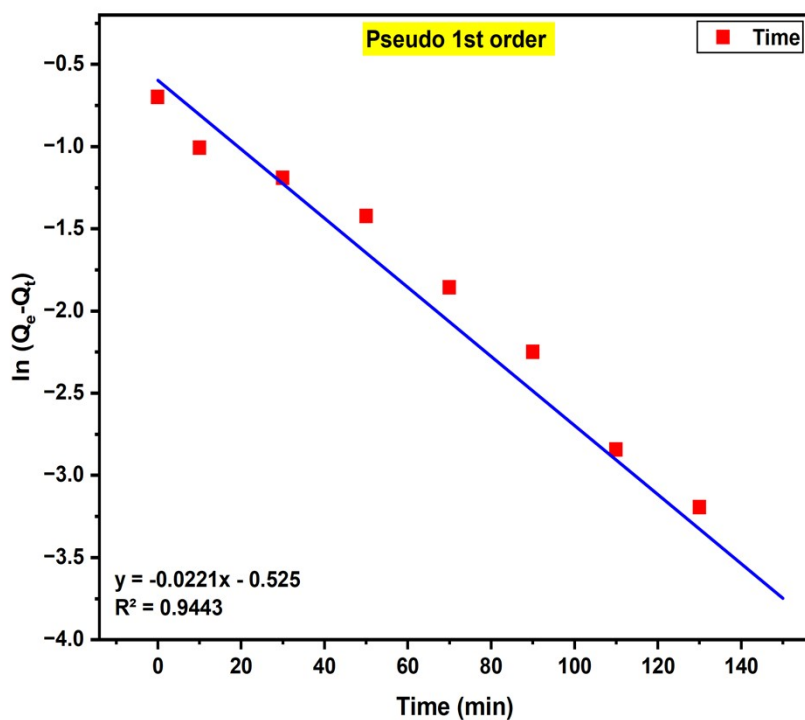

Figure S19a: The plot showing kinetics of Pseudo first-order for removal of crystal violet dye by PPY-SnO<sub>2</sub> NCs

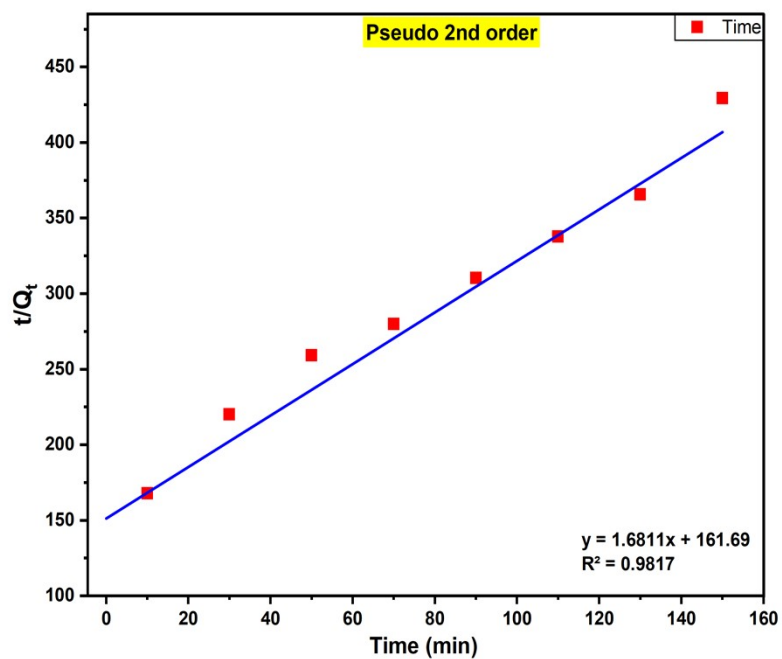

**Figure S19b:** The plot showing kinetics of Pseudo-second-order for removal of Crystal violet dye by PPy-SnO<sub>2</sub> NCs.

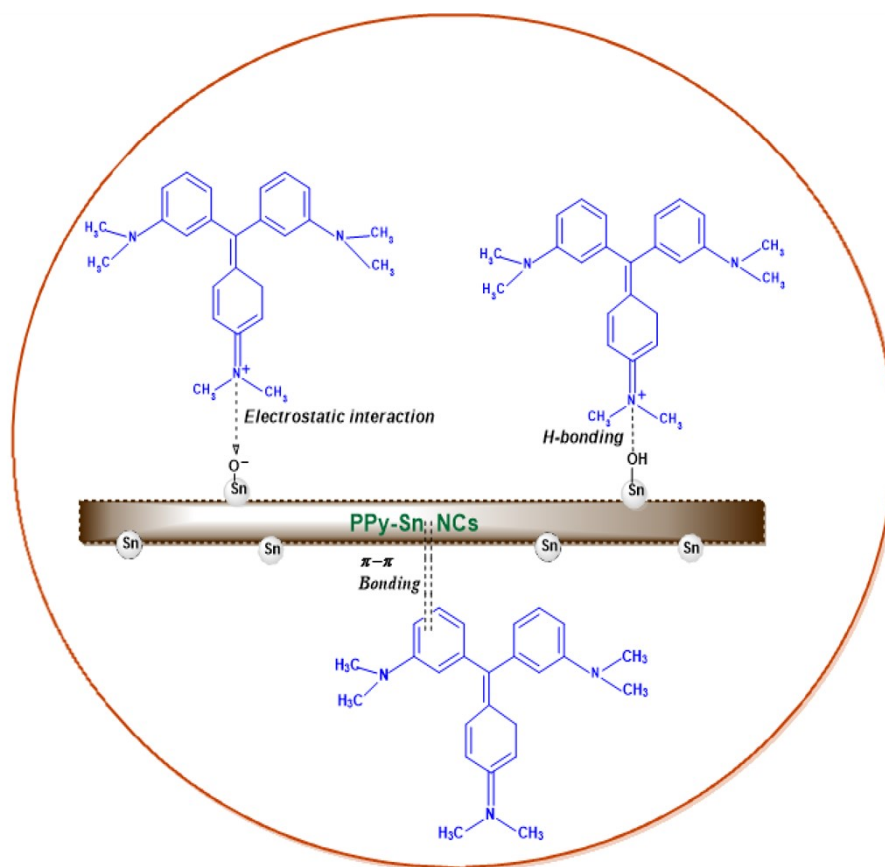

**Figure S20:** Adsorption of Crystal Violet on PPy-SnO<sub>2</sub> nanocomposites via electrostatic, hydrogen-bonding, and  $\pi$ - $\pi$  interactions

**Table S1:** SEM EDS analysis of the synthesized PPy- SnO<sub>2</sub> nanocomposites.

| Element | Line | Mass%       | Atom%       |
|---------|------|-------------|-------------|
| C       | K    | 14.1 ± 0.18 | 26.6 ± 0.34 |
| N       | K    | 3.8 ± 0.30  | 5.4 ± 0.41  |
| O       | K    | 36.3 ± 0.83 | 57.8 ± 1.17 |
| Sn      | L    | 45.8 ± 1.44 | 10.2 ± 0.27 |
| Total   |      | 100.00      | 100.00      |

| Element | Line | Mass%      | Atom%      |
|---------|------|------------|------------|
| C       | K    | 13.5 ± 0.2 | 44.9 ± 0.3 |
| N       | K    | 2.5 ± 0.19 | 6.8 ± 0.2  |
| O       | K    | 29.5 ± 0.8 | 29.1 ± 0.9 |
| Sn      | K    | 54.5 ± 1.2 | 19.2 ± 0.3 |
| Total   |      | 100        | 100        |

**Table S2:** HRTEM-EDS analysis of the synthesized PPy- SnO<sub>2</sub> nanocomposites.



**Table S3:** Antioxidant Activity (% DPPH Scavenging)

| Sample                   | Solvent  | 10 mg (%)    | 20 mg (%)    | 30 mg (%)    | 40 mg (%)    |
|--------------------------|----------|--------------|--------------|--------------|--------------|
| Ascorbic Acid            | Hexane   | 23.57 ± 0.07 | 28.32 ± 0.03 | 35.83 ± 0.11 | 40.09 ± 0.03 |
|                          | Methanol | 92.67 ± 0.09 | 97.53 ± 0.11 | 97.62 ± 0.08 | 98.21 ± 0.13 |
| PPy                      | Hexane   | 36.25 ± 0.08 | 42.57 ± 0.11 | 52.21 ± 0.05 | 54.18 ± 0.09 |
|                          | Methanol | 52.90 ± 0.02 | 55.62 ± 0.03 | 61.33 ± 0.07 | 62.95 ± 0.03 |
| PPy-SnO <sub>2</sub> NCs | Hexane   | 45.14 ± 0.13 | 50.64 ± 0.15 | 57.92 ± 0.09 | 58.98 ± 0.11 |
|                          | Methanol | 68.13 ± 0.03 | 75.92 ± 0.05 | 83.58 ± 0.07 | 87.91 ± 0.06 |

**Table S4:** Antioxidant Activity (% ABTS Scavenging)

| Sample                   | Solvent  | 10 mg (%)    | 20 mg (%)    | 30 mg (%)    | 40 mg (%)    |
|--------------------------|----------|--------------|--------------|--------------|--------------|
| Ascorbic Acid            | Methanol | 98.47 ± 0.09 | 96.83 ± 0.07 | 99.23 ± 0.03 | 99.85 ± 0.08 |
|                          | Hexane   | 47.87 ± 0.02 | 53.73 ± 0.05 | 56.73 ± 0.01 | 57.21 ± 0.03 |
| PPy                      | Methanol | 47.76 ± 0.03 | 48.78 ± 0.01 | 53.13 ± 0.03 | 61.62 ± 0.05 |
|                          | Hexane   | 18.16 ± 0.01 | 25.29 ± 0.03 | 39.38 ± 0.02 | 41.51 ± 0.02 |
| PPy-SnO <sub>2</sub> NCs | Methanol | 65.86 ± 0.03 | 73.98 ± 0.05 | 82.76 ± 0.03 | 90.8 ± 0.02  |
|                          | Hexane   | 42.65 ± 0.03 | 45.28 ± 0.01 | 51.87 ± 0.03 | 60.24 ± 0.01 |

**Table S5:** Comparison of isotherm and kinetic parameters for crystal violet dye adsorption on PPy-SnO<sub>2</sub> nanocomposites.

| Values           | Langmuir | Freundlich | pseudo 1st | pseudo 2nd |
|------------------|----------|------------|------------|------------|
| Q <sub>max</sub> | 162.6    | –          | –          | –          |
| R <sub>2</sub>   | 0.9698   | 0.8946     | 0.9443     | 0.998      |
| K <sub>L</sub>   | 0.48     | –          | –          | –          |
| K <sub>F</sub>   | –        | 60.9       | –          | –          |
| n                | –        | 3.09       | –          | –          |
| Q <sub>e</sub>   | –        | –          | 0.591      | 0.598      |
| k <sub>1</sub>   | –        | –          | 0.221      | –          |
| k <sub>2</sub>   | –        | –          | –          | 0.0175     |

The adsorption performance of the dye on PPy-SnO<sub>2</sub> NCs was evaluated using both isotherm and kinetic models. The Langmuir isotherm suggested monolayer adsorption with a maximum capacity of 162.6 mg·g<sup>-1</sup> (K<sub>L</sub> = 0.48 L·mg<sup>-1</sup>, R<sup>2</sup> = 0.9698), while the Freundlich model indicated multilayer adsorption on heterogeneous sites (K<sub>F</sub> = 60.9, n = 3.09, R<sup>2</sup> = 0.8946). Kinetic analysis showed that the pseudo-first-order model reasonably described the adsorption process (Q<sub>e, cal</sub> = 0.591 mg·g<sup>-1</sup>, k<sub>1</sub> = 0.221 min<sup>-1</sup>, R<sup>2</sup> = 0.9443), whereas the pseudo-second-order model provided a slightly better fit (Q<sub>e, cal</sub> = 0.598 mg·g<sup>-1</sup>, k<sub>2</sub> = 0.0175 g·mg<sup>-1</sup>·min<sup>-1</sup>, R<sup>2</sup> = 0.998). Overall, these findings confirm that adsorption is primarily governed by physisorption, highlighting the efficiency of PPy-SnO<sub>2</sub> NCs nanoparticles for dye removal applications.

**Table S6:** Comparison table for CV dye adsorption performance of PPy-SnO<sub>2</sub> NCs with reported adsorbents.

| Adsorbent                                            | q <sub>max</sub> (mg g <sup>-1</sup> ) | Optimum pH | Temperature (°C) | Contact Time (min) | Reference   |
|------------------------------------------------------|----------------------------------------|------------|------------------|--------------------|-------------|
| PPy-SnO <sub>2</sub>                                 | 162.6                                  | 7          | 50               | 150                | [our study] |
| Ferrite-biochar composite                            | 325.4                                  | 7-8        | 30               | 120                | [64]        |
| Modified carbon spheres                              | 134.6                                  | 6          | 25               | 180                | [65]        |
| Carbon-sphere / Titania-nanotube composite (TNTs@Cs) | 84.7                                   | 5.5        | 25–30            | 180                | [66]        |
| Natural clay                                         | 203.6                                  | 7          | 25               | 120                | [67]        |
